# Supplementary material for: Bee Health and Productivity in Apis mellifera, a Consequence of Multiple Factors
Source: MDPI journal article supplement (doi:10.3390/vetsci8050076), 2021-05-04
Supplement: s1 [file s1]

## Supplementary information

**Table S1.** Available sources of nectar and pollen in the studied territory.

| Crop or species             | Frequency | Crop or species                | Frequency |
|-----------------------------|-----------|--------------------------------|-----------|
| Corn                        | 27        | Grassland                      | 2         |
| Alfalfa                     | 25        | <i>Tabebuia</i> spp.           | 2         |
| <i>Melilotus</i> sp.        | 23        | <i>Lamium amplexicaule</i> L.  | 2         |
| White clover                | 22        | <i>Chamaemelum nobile</i> L.   | 2         |
| Thistle                     | 22        | <i>Sisymbrium irium</i> L.     | 2         |
| Soybean                     | 20        | Palm trees                     | 2         |
| Eucalyptus                  | 20        | Blackberry                     | 2         |
| Lotus                       | 19        | <i>Polygolum acuminatum</i>    | 2         |
| Turnip                      | 13        | <i>Austrocedrus chilensis</i>  | 1         |
| Wheat                       | 12        | <i>Manihot flabellifolia</i>   | 1         |
| Sunflower                   | 12        | <i>Fraxinus pennsylvannica</i> | 1         |
| <i>Baccharis latifolia</i>  | 12        | <i>Salvia hispanica</i>        | 1         |
| <i>Parkinsonia aculeata</i> | 9         | <i>Salix</i> sp.               | 2         |
| <i>Taraxacum officinale</i> | 7         | Wild flora                     | 2         |
| <i>Sorghum</i> spp.         | 6         | <i>Alnus acuminata</i>         | 1         |
| <i>Ligustrum</i> spp.       | 6         | <i>Eichornia crassipes</i>     | 1         |
| Rapeseed                    | 4         | Chicory                        | 1         |
| <i>Acacia</i> spp.          | 4         | <i>Cichorium intybus</i>       | 1         |
| <i>Tilia cordata</i>        | 3         | <i>Vachellia caven</i>         | 1         |
| Citrus                      | 2         | <i>Ammi majus</i> L.           | 1         |

**Table S2.** Bivariate correlations analysis (Pearson's) between the parameters related to structure of the hive, climatic conditions, infestation rate (IR%) by *Varroa* sp. mites and estimated production of honey per hive and per year.

|                                     |          | Frames<br>(Total<br>Nr.) | Bees<br>entering<br>the<br>hive/min | Temp.     | %RH       | Wind<br>speed | Producti-<br>vity | %IR       |
|-------------------------------------|----------|--------------------------|-------------------------------------|-----------|-----------|---------------|-------------------|-----------|
| Frames<br>(Total Nr.)               | <i>r</i> | 1.000                    | 0.089                               | -0.085    | 0.140*    | -0.015        | 0.251*            | -0.118*   |
|                                     | <i>p</i> |                          | 0.0303191                           | 0.313830  | 0.0186170 | 0.0468085     | 0.0074468         | 0.0234043 |
| Adult<br>bees <sup>a</sup>          | <i>r</i> | 0.169*                   | 0.130*                              | -0.068    | -0.023    | 0.061         | 0.183*            | -0.206*   |
|                                     | <i>p</i> | 0.0148936                | 0.0202128                           | 0.0319149 | 0.0430851 | 0.0340426     | 0.0127660         | 0.011702  |
| Capped<br>brood <sup>a</sup>        | <i>r</i> | 0.044                    | 0.659*                              | 0.490*    | -0.415*   | -0.034        | 0.023             | -0.155*   |
|                                     | <i>p</i> | 0.0377660                | 0.0005319                           | 0.0026596 | 0.0053191 | 0.0420213     | 0.0441489         | 0.0170213 |
| Open<br>brood <sup>a</sup>          | <i>r</i> | -0.004                   | 0.531*                              | 0.440*    | -0.494*   | -0.000056     | 0.104*            | -0.142*   |
|                                     | <i>p</i> | 0.0494681                | 0.0010638                           | 0.0031915 | 0.0058511 | 0.0500000     | 0.0271277         | 0.0196809 |
| Honey <sup>a</sup>                  | <i>r</i> | 0.116*                   | -0.291*                             | -0.300*   | 0.305*    | 0.098*        | 0.106*            | 0.041     |
|                                     | <i>p</i> | 0.0239362                | 0.0015957                           | 0.0037234 | 0.0063830 | 0.0292553     | 0.0265957         | 0.0393617 |
| Pollen <sup>a</sup>                 | <i>r</i> | -0.010                   | 0.168*                              | 0.178*    | -0.213*   | 0.044         | 0.264*            | -0.007    |
|                                     | <i>p</i> | 0.0473404                | 0.0159574                           | 0.0132979 | 0.0101064 | 0.038979      | 0.0079787         | 0.0484043 |
| Frame heads<br>covered with<br>bees | <i>r</i> | 0.042                    | -0.038                              | -0.198*   | 0.137*    | -0.023        | 0.006             | -0.038    |
|                                     | <i>p</i> | 0.0388298                | 0.0398936                           | 0.0122340 | 0.0191489 | 0.0436170     | 0.0489362         | 0.0409574 |
| Bees entering<br>the hive/min       | <i>r</i> | 0.089                    | 1.000                               | 0.465*    | -0.265*   | -0.110*       | 0.110*            | -0.149*   |
|                                     | <i>p</i> | 0.0297872                |                                     | 0.0042553 |           | 0.0255319     | 0.0260638         | 0.0175532 |
| Temperature                         | <i>r</i> | -0.085                   | 0.465*                              | 1.000     | -0.599*   | -0.173*       | 0.056             | -0.173*   |
|                                     | <i>p</i> | 0.0308511                | 0.0021277                           |           | 0.0069149 | 0.0143617     | 0.0361702         | 0.0154255 |
| %RH                                 | <i>r</i> | 0.140*                   | -0.265*                             | -0.599*   | 1.000     | 0.019         | -0.055            | 0.105*    |
|                                     | <i>p</i> | 0.0180851                |                                     | 0.0047872 |           | 0.0457447     | 0.0367021         | 0.0276596 |
| Wind<br>speed                       | <i>r</i> | -0.015                   | -0.110*                             | -0.173*   | 0.019     | 1.000         | 0.132*            | -0.060    |
|                                     | <i>p</i> | 0.0462766                | 0.0250000                           | 0.138298  | 0.0452128 |               | 0.0212766         | 0.0345745 |

<sup>a</sup> Comb sides

*r*: Pearson's r correlation coefficient; *p*: p-value, corrected according to Benjamini & Hochberg (1995) method.

\* Correlation is significant in the 0.05 level.

**Table S3.** Non-parametric tests between estimated production of honey and the most relevant variables.

| Variable                | <i>p</i> -value | Test |
|-------------------------|-----------------|------|
| Change of the queen     | 0.013*          | M-W  |
| Nuclei preparation      | < 0.001*        | M-W  |
| Total nr. of frames     | < 0.001*        | K-W  |
| Disinfection            | 0.001*          | M-W  |
| Trashumance             | 0.133           | M-W  |
| Pollination             | 0.022*          | M-W  |
| Supplementary food      | 0.042*          | K-W  |
| Apiary size             | < 0.001*        | K-W  |
| Training                | 0.001*          | M-W  |
| Source of income        | < 0.001*        | M-W  |
| Dedicated storage space | 0.841           | M-W  |
| Clinical signs          | < 0.001*        | M-W  |

M-W: Mann-Whitney test.

K-W: Kruskal-Wallis test.

(\*) Significant differences ( $\alpha = 0.05$ )

**Table S4.** Bivariate correlations analysis (Pearson's) between main variables related to the estimated productivity of honey per year and *Varroa* sp. mite infestation rate (IR%).

|                         |          | Productivity | IR%       |
|-------------------------|----------|--------------|-----------|
| Change of the queen     | <i>r</i> | 0.124*       | 0.051     |
|                         | <i>p</i> | 0.0218085    | 0.372340  |
| Nuclei preparation      | <i>r</i> | 0.264*       | 0.058     |
|                         | <i>p</i> | 0.0085106    | 0.0351064 |
| Disinfection            | <i>r</i> | 0.116*       | -0.063    |
|                         | <i>p</i> | 0.0244681    | 0.0335106 |
| Supplementary food      | <i>r</i> | -0.081       | -0.124*   |
|                         | <i>p</i> | 0.0319149    | 0.0223404 |
| Apiary size             | <i>r</i> | 0.203*       | -0.102*   |
|                         | <i>p</i> | 0.0117021    | 0.0287234 |
| Training                | <i>r</i> | -0.134*      | 0.022     |
|                         | <i>p</i> | 0.0207447    | 0.0446809 |
| Source of income        | <i>r</i> | 0.158*       | -0.036    |
|                         | <i>p</i> | 0.0164894    | 0.0414894 |
| Dedicated storage space | <i>r</i> | -0.010       | -0.124*   |
|                         | <i>p</i> | 0.0478723    | 0.0228723 |

*r*: Pearson's r correlation coefficient; *p*: p-value, corrected according to Benjamini & Hochberg (1995) method.

\* Correlation is significant in the 0.05 level.

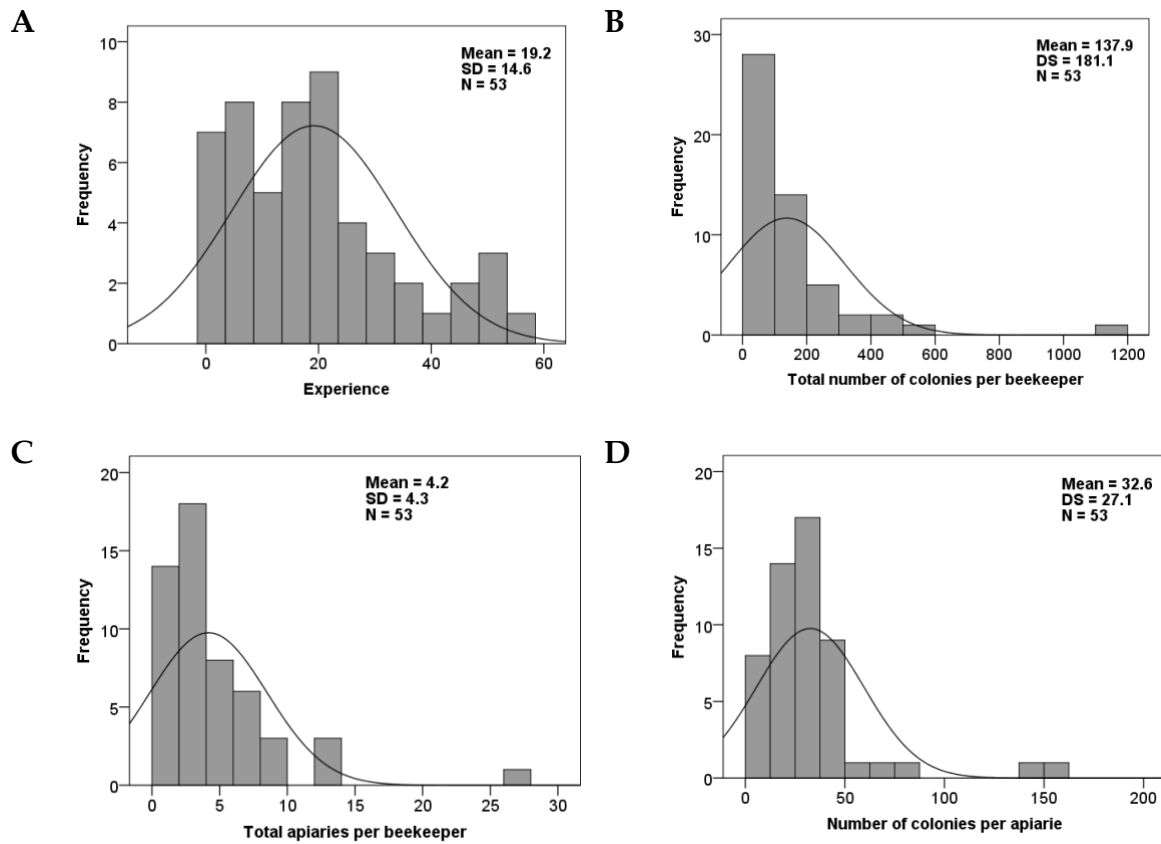

**Figure S1.** General information about beekeepers. A) Years of experience in the field, B) Total amount of honeybee colonies per beekeeper, C) The total number of apiaries per beekeeper and D) Number of colonies per apiary.

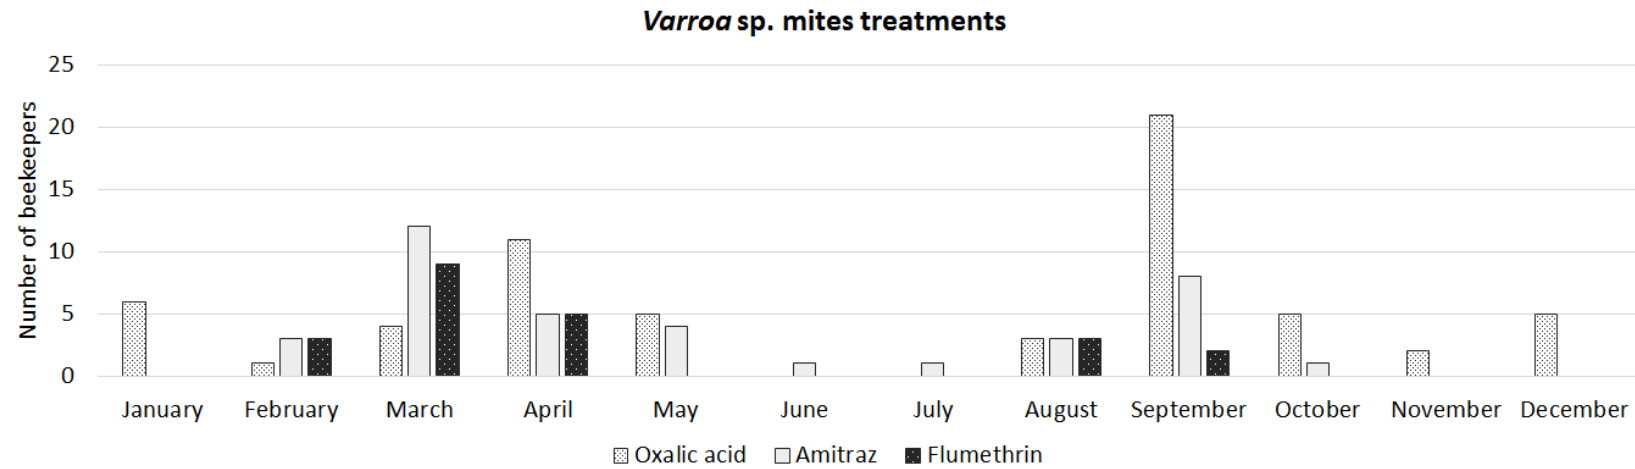

**Figure S2.** Most used treatments against *Varroa* sp. mites and its application during the year. Oxalic acid is used by 79.2% of the beekeepers, while Amitraz and flumethrin are used in 50.9% and 37.7% of the cases. Other treatments are also used (9.5%), including formic acid, coumaphos and fuvalinate.

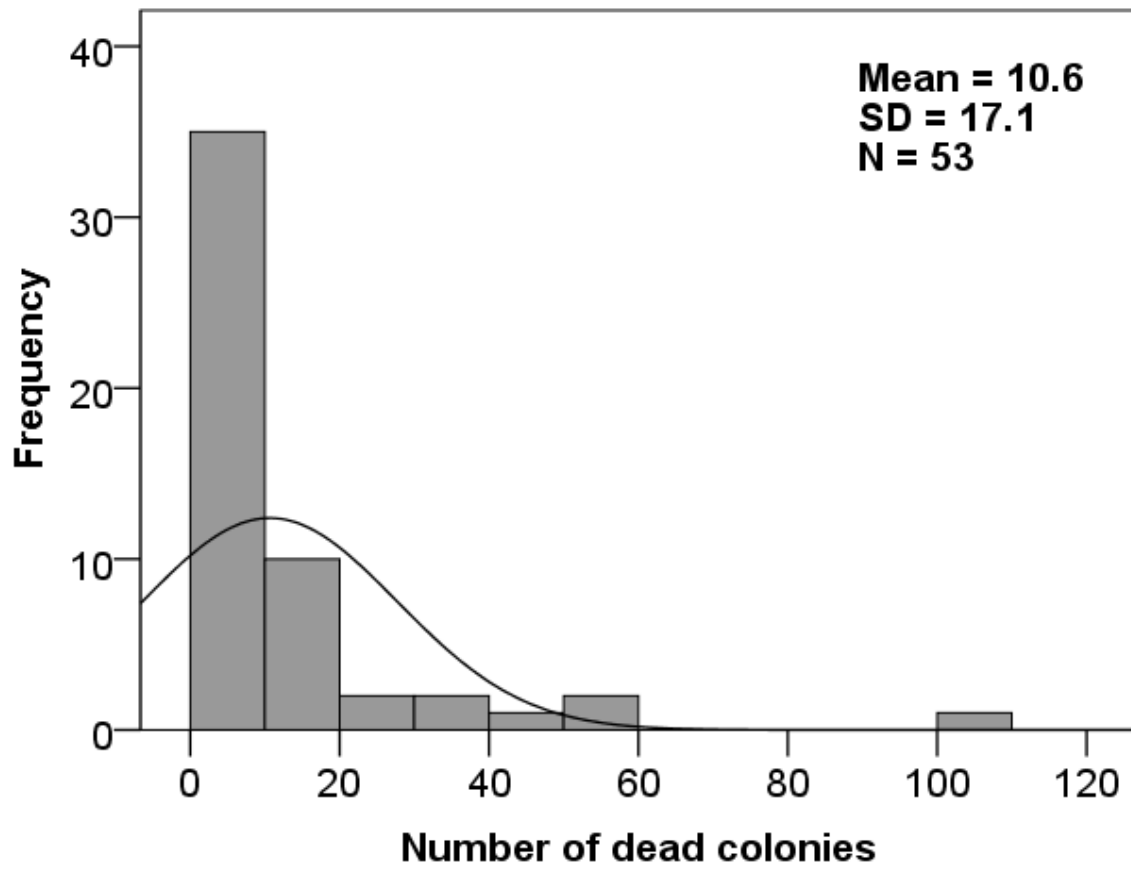

**Figure S3.** Colony losses (dead colonies) during the previous year.

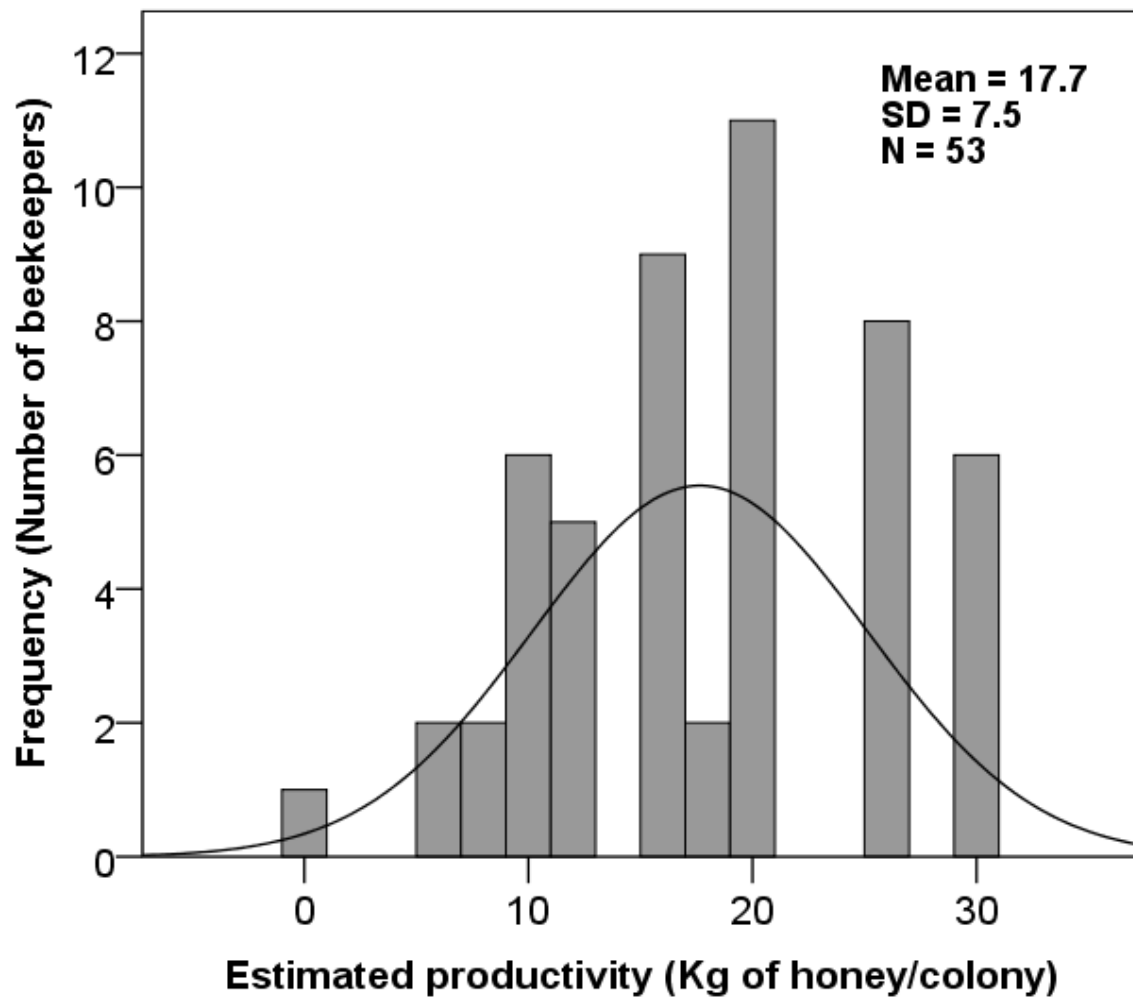

**Figure S4.** Estimated production of honey during the last year. Results are shown as the frequency (number of the beekeepers) against the quantity of honey produced in the previous year (Kg) per honeybee colony.
